# Supplementary material
Source: PubMed Central journal article supplement (PMC4536552)
Supplement: NIHMS713910-supplement-Appendix_2.pdf [file NIHMS713910-supplement-Appendix_2.pdf]

## **Appendix 2**

### **Supplemental figures**

| <i>#</i> | <i>Title</i>                                                                                                    | <i>Page</i> |
|----------|-----------------------------------------------------------------------------------------------------------------|-------------|
| 1)       | Competing risks framework                                                                                       | 2           |
| 2)       | Models for prediction of 10-year absolute risk reduction with aspirin treatment                                 | 3           |
| 3)       | Models for prediction of 15-year absolute risk reduction with aspirin treatment                                 | 4           |
| 4)       | Calibration plots                                                                                               | 5           |
| 5)       | Absolute risks, absolute risk reductions and numbers needed to treat/harm for aspirin                           | 6-7         |
| 6)       | Distribution of predicted 10-year absolute risk reduction with aspirin treatment                                | 8           |
| 7)       | Distribution of predicted 15-year absolute risk reduction with aspirin treatment for women of 65 year and older | 9           |
| 8)       | Effect of baseline risk and age on predicted 15-year absolute risk reduction                                    | 10          |
| 9)       | Decision curves for different aspirin treatment strategies for the individual outcomes                          | 11          |

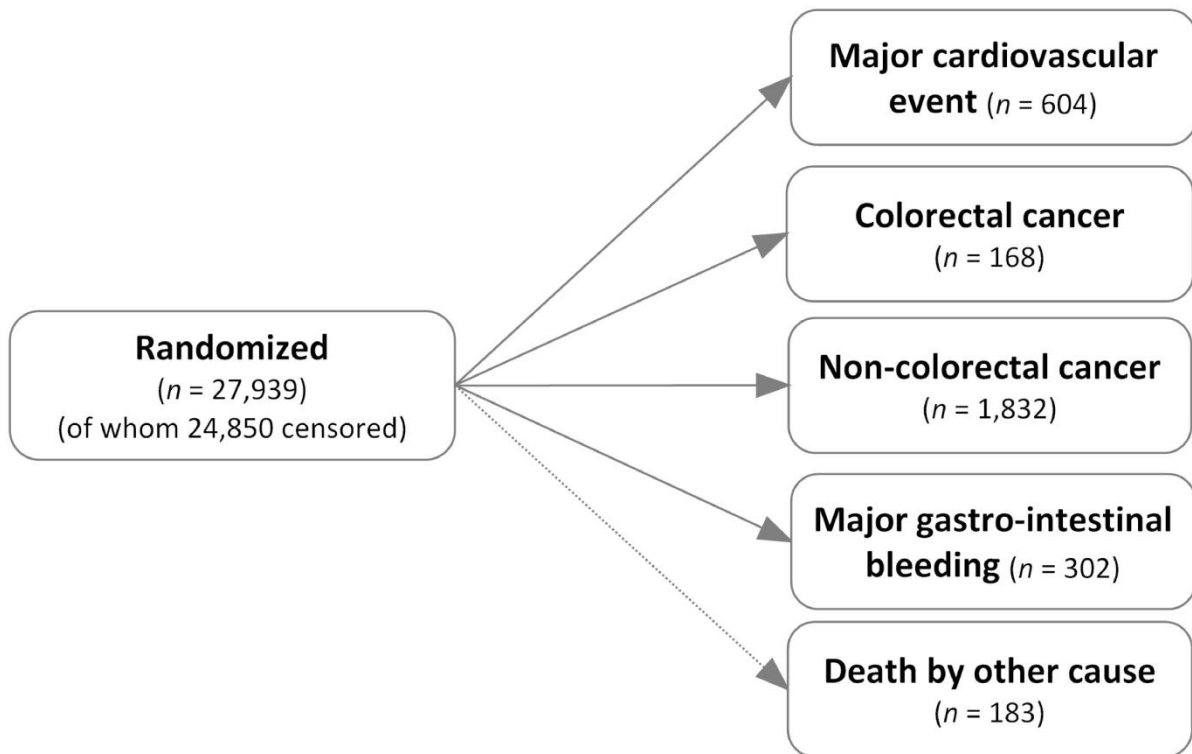

**Appendix 2.1** | Competing risks framework with number of events during trial period (*i.e.* from baseline through 31 March 2004, average follow-up of 10.1 years) in women included in the Women’s Health Study who provided an adequate baseline plasma sample. Models for the prediction of absolute effects of aspirin on major cardiovascular events, colorectal cancer, non-colorectal cancer and major gastro-intestinal bleeding were developed. No separate model was developed for prediction of the effects on death by other causes, since no effects of aspirin on this outcome was expected, given that all relevant outcomes (major cardiovascular events, colorectal cancer, non-colorectal cancer and major gastro-intestinal bleeding) are already taken into account. Death by other causes was taken into account as competing risks outcome when modelling the other outcomes, because not taking competing risks into account may lead to bias in predictions of absolute risks.

## Appendix 2.2 | Models for prediction of 10-year absolute risk reduction with aspirin treatment

---

**Predicted 10-year absolute risk reduction = Total risk without aspirin treatment – Total risk with aspirin treatment, where**

Total risk without aspirin treatment: *Total of model risk estimates for all outcomes, when aspirin treatment is set to 'FALSE'.*

Total risk on aspirin treatment: *Total of model risk estimates for all outcomes, when aspirin treatment is set to 'TRUE'.*

### **Model for prediction of 10-year major cardiovascular event risk**

$(1 - \exp(- (0.01068 * \exp(A - 20.51836)))) * 100\%$ , where

$A = 0.07750 * \text{age (years)} + 0.91719 [\text{if current smoker}] - 0.02174 * \text{body mass index (kg/m}^2) + 3.27143 * \text{natural logarithm(systolic blood pressure, mmHg)} + 0.25540 [\text{if using blood pressure lowering medication}] + 0.28204 [\text{if family history of premature myocardial infarction}] + 0.83017 * \text{natural logarithm(total cholesterol, mg/dL)} - 0.90235 * \text{natural logarithm(high-density lipoprotein cholesterol, mg/dL)} + 0.11419 * \text{natural logarithm(high-sensitivity C-reactive protein, mg/L)} + 0.17444 * \text{hemoglobin A1c (\%)} [\text{if diabetic}] - 0.09592 [\text{if using aspirin}]$

### **Model for prediction of 10-year colorectal cancer risk**

$(1 - \exp(- (0.00287 * \exp(B - 4.854)))) * 100\%$ , where

$B = 0.06907 * \text{age (years)} + 0.15647 [\text{if ever smoker}] + 0.03173 * \text{body mass index (kg/m}^2) + 0.00180 * \text{height (inches)} - 0.01487 [\text{if diabetic}] + 0.03258 * \text{no. of alcoholic drinks per day} + 0.28102 [\text{if peri- / postmenopausal}] - 0.26464 [\text{if ever used hormone replacement therapy}] + 0.12076 [\text{if family history of colorectal cancer}] - 0.05372 [\text{if using aspirin}]$

### **Model for prediction of 10-year non-colorectal cancer risk**

$(1 - \exp(- (0.05554 * \exp(C - 3.40691)))) * 100\%$ , where

$C = 0.04287 * \text{age (years)} + 0.14222 [\text{if ever smoker}] + 0.00125 * \text{body mass index (kg/m}^2) + 0.01469 * \text{height (inches)} - 0.14474 [\text{if diabetic}] + 0.07571 * \text{no. of alcoholic drinks per day} - 0.14239 [\text{if peri- / postmenopausal}] + 0.04985 [\text{if ever used hormone replacement therapy}] + 0.00181 [\text{if family history of cancer}] + 0.046578 [\text{if using aspirin}]$

### **Model for prediction of 10-year major gastro-intestinal bleeding risk**

$(1 - \exp(- (0.00742 * \exp(D - 4.53537)))) * 100\%$ , where

$D = 0.06209 * \text{age (years)} + 0.22339 [\text{if current smoker}] + 0.03316 * \text{body mass index (kg/m}^2) + 0.26552 [\text{if diabetic}] + 0.00652 * \text{no. of alcoholic drinks per day} + 0.21780 [\text{if history of dyspepsia}] + 0.45399 [\text{if using aspirin}]$

---

*Outcomes were modelled in a competing risks framework, mutually accounting for all outcomes as well as death by other causes (Appendix 2.1), because not taking competing risks into account may lead to bias in predictions of absolute risks and non-additivity of risks for the individual outcomes<sup>23,24</sup>. No separate model was developed for prediction of the effects of aspirin on death by other causes, since no effects of aspirin on this outcome was expected, given that all relevant outcomes (major cardiovascular events, colorectal cancer, non-colorectal cancer and major gastro-intestinal bleeding) are already taken into account.*

## Appendix 2.3 | Models for prediction of 15-year absolute risk reduction with aspirin treatment

---

**Predicted 15-year absolute risk reduction = Total risk without aspirin treatment – Total risk with aspirin treatment, where**

Total risk without aspirin treatment: *Total of model risk estimates for all outcomes, when aspirin treatment is set to 'FALSE'.*

Total risk on aspirin treatment: *Total of model risk estimates for all outcomes, when aspirin treatment is set to 'TRUE'.*

### ***Model for prediction of 15-year major cardiovascular event risk***

$(1 - \exp(- (0.01602 * \exp(A - 20.51836)))) * 100\%$ , where

$A = 0.07750 * \text{age (years)} + 0.91719 [\text{if current smoker}] - 0.02174 * \text{body mass index (kg/m}^2) + 3.27143 * \text{natural logarithm(systolic blood pressure, mmHg)} + 0.25540 [\text{if using blood pressure lowering medication}] + 0.28204 [\text{if family history of premature myocardial infarction}] + 0.83017 * \text{natural logarithm(total cholesterol, mg/dL)} - 0.90235 * \text{natural logarithm(high-density lipoprotein cholesterol, mg/dL)} + 0.11419 * \text{natural logarithm(high-sensitivity C-reactive protein, mg/L)} + 0.17444 * \text{hemoglobin A1c (\%)} [\text{if diabetic}] - 0.09592 [\text{if using aspirin}]$

### ***Model for prediction of 15-year colorectal cancer risk***

$(1 - \exp(- (0.00428 * \exp(B - 6.89174)))) * 100\%$ , where

$B = 0.05465 * \text{age (years)} + 0.18407 [\text{if ever smoker}] + 0.03713 * \text{body mass index (kg/m}^2) + 0.03973 * \text{height (inches)} - 0.27643 [\text{if diabetic}] + 0.15733 * \text{no. of alcoholic drinks per day} + 0.62717 [\text{if peri- / postmenopausal}] - 0.29949 [\text{if ever used hormone replacement therapy}] + 0.14094 [\text{if family history of colorectal cancer}] - 0.14483 [\text{if using aspirin}]$

### ***Model for prediction of 15-year non-colorectal cancer risk***

$(1 - \exp(- (0.09493 * \exp(C - 3.61989)))) * 100\%$ , where

$C = 0.03598 * \text{age (years)} + 0.17283 [\text{if ever smoker}] + 0.00735 * \text{body mass index (kg/m}^2) + 0.02162 * \text{height (inches)} - 0.03080 [\text{if diabetic}] + 0.09586 * \text{no. of alcoholic drinks per day} - 0.13779 [\text{if peri- / postmenopausal}] + 0.06473 [\text{if ever used hormone replacement therapy}] + 0.06062 [\text{if family history of cancer}] + 0.01568 [\text{if using aspirin}]$

### ***Model for prediction of 15-year major gastro-intestinal bleeding risk***

$(1 - \exp(- (0.01113 * \exp(D - 4.53537)))) * 100\%$ , where

$D = 0.06209 * \text{age (years)} + 0.22339 [\text{if current smoker}] + 0.03316 * \text{body mass index (kg/m}^2) + 0.26552 [\text{if diabetic}] + 0.00652 * \text{no. of alcoholic drinks per day} + 0.21780 [\text{if history of dyspepsia}] + 0.45399 [\text{if using aspirin}]$

---

*Outcomes were modelled in a competing risks framework, mutually accounting for all outcomes as well as death by other causes (Appendix 2.1), because not taking competing risks into account may lead to bias in predictions of absolute risks and non-additivity of risks for the individual outcomes<sup>23 24</sup>. No separate model was developed for prediction of the effects of aspirin on death by other causes, since no effects of aspirin on this outcome was expected, given that all relevant outcomes (major cardiovascular events, colorectal cancer, non-colorectal cancer and major gastro-intestinal bleeding) are already taken into account.*

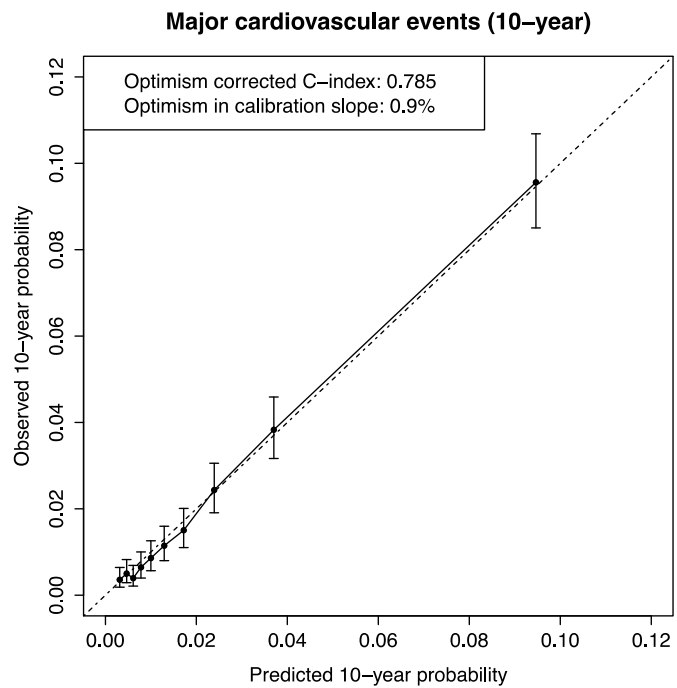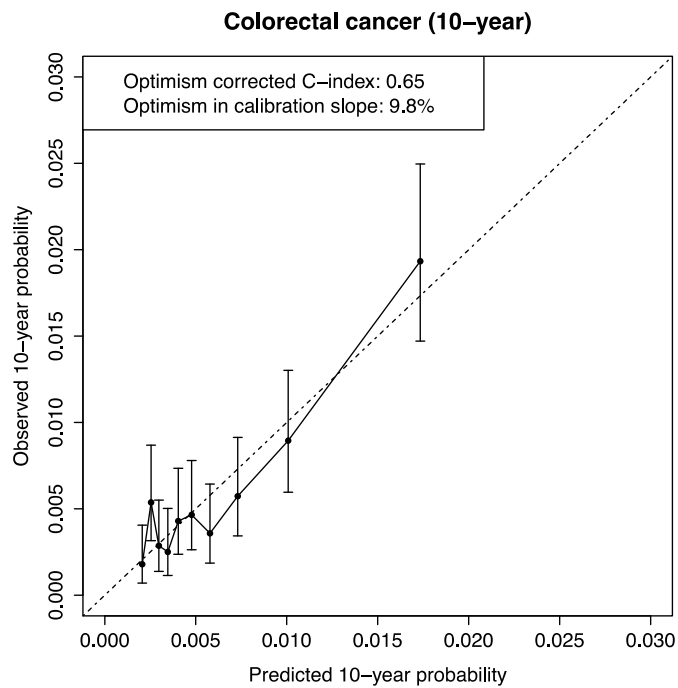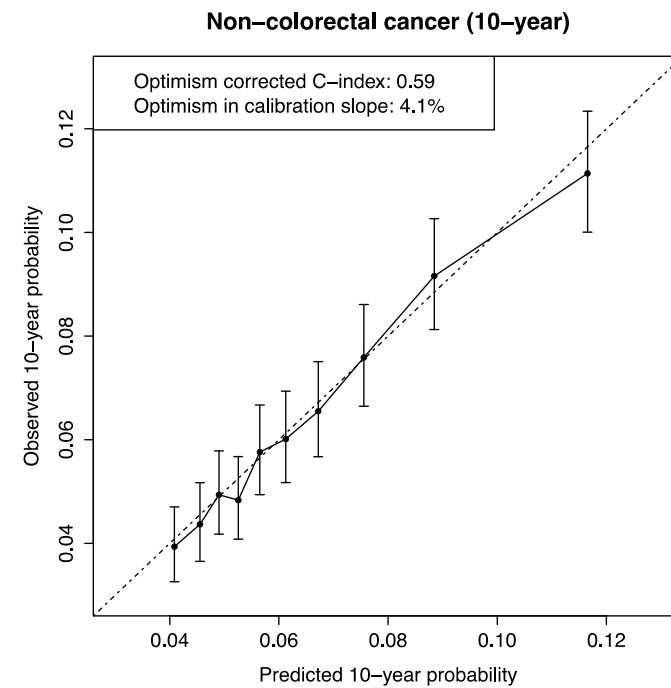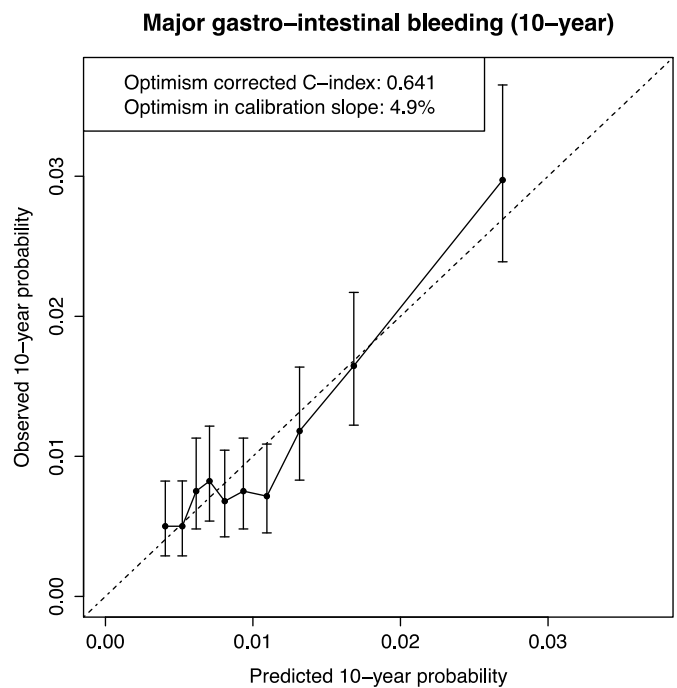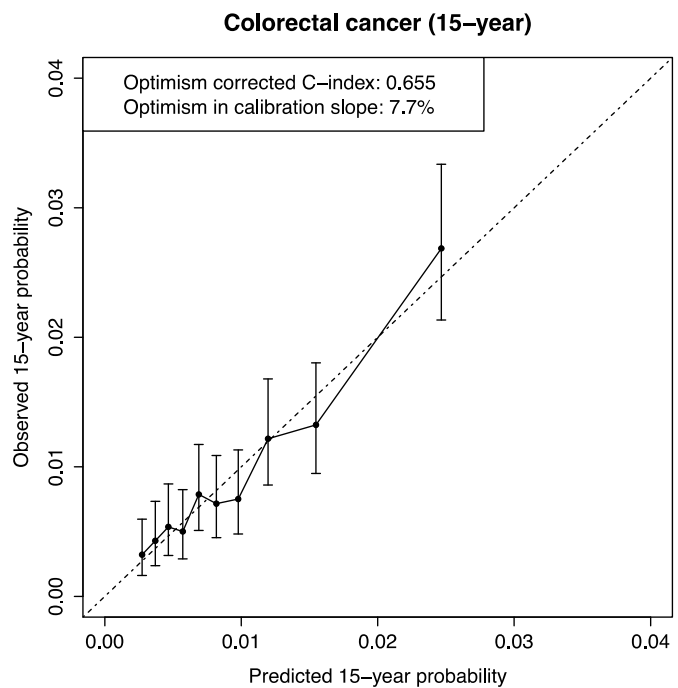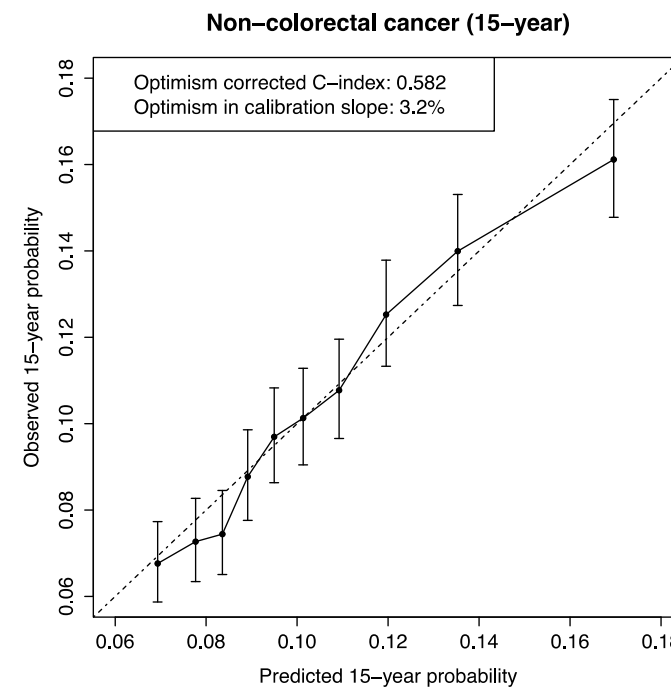

**Appendix 2.4** | Calibration plots. Axis scales differ between plots. Plots were created with R-code adjusted from: *N.P. Bleda. Interval-censored semi-competing risks data : a novel approach for modelling bladder cancer. Thesis, Universitat Politècnica de Catalunya, Barcelona, June 2010.*

|                               |                                      | Major cardiovascular disease                               | Colorectal cancer                                       | Non-colorectal cancer                                      | Major gastro-intestinal bleeding                         |
|-------------------------------|--------------------------------------|------------------------------------------------------------|---------------------------------------------------------|------------------------------------------------------------|----------------------------------------------------------|
|                               |                                      | Estimate (95% CI)                                          | Estimate (95% CI)                                       | Estimate (95% CI)                                          | Estimate (95% CI)                                        |
| <b>Total study population</b> |                                      |                                                            |                                                         |                                                            |                                                          |
| 10-year                       | AR without aspirin (%)               | 2.27 (2.03 to 2.53)                                        | 0.61 (0.49 to 0.75)                                     | 6.40 (6.00 to 6.82)                                        | 0.83 (0.69 to 0.99)                                      |
|                               | AR with aspirin (%)                  | 2.09 (1.86 to 2.34)                                        | 0.60 (0.48 to 0.74)                                     | 6.67 (6.26 to 7.10)                                        | 1.33 (1.15 to 1.53)                                      |
|                               | ARR (%)                              | 0.18 (0.02 to 0.95)                                        | 0.01 (0.00 to 32.05)                                    | -0.27 (-0.86 to 0.32)                                      | -0.50 (-0.26 to -0.75)                                   |
|                               | <sup>a</sup> NNT or <sup>b</sup> NNH | 550 (106 to >1000) <sup>a</sup>                            | >1000 (3 to >1000) <sup>a</sup>                         | 370 <sup>b</sup> (117 <sup>b</sup> to 317 <sup>a</sup> )   | 199 (134 to 390) <sup>b</sup>                            |
| 15-year                       | AR without aspirin (%)               | 3.38 (3.14 to 3.64)                                        | 1.01 (0.85 to 1.18)                                     | 10.44 (9.93 to 10.96)                                      | 1.24 (1.09 to 1.40)                                      |
|                               | AR with aspirin (%)                  | 3.11 (2.88 to 3.36)                                        | 0.86 (0.72 to 1.03)                                     | 10.52 (10.01 to 11.04)                                     | 1.99 (1.80 to 2.19)                                      |
|                               | ARR (%)                              | 0.27 (0.06 to 0.86)                                        | 0.14 (0.02 to 0.59)                                     | -0.08 (-0.80 to 0.64)                                      | -0.75 (-0.50 to -1.00)                                   |
|                               | <sup>a</sup> NNT or <sup>b</sup> NNH | 371 (116 to >1000) <sup>a</sup>                            | 709 (170 to >1000) <sup>a</sup>                         | >1000 <sup>b</sup> (124 <sup>b</sup> to 156 <sup>a</sup> ) | 133 (100 to 198) <sup>b</sup>                            |
| <b>Women &lt;65 years</b>     |                                      |                                                            |                                                         |                                                            |                                                          |
| 10-year                       | AR without aspirin (%)               | 1.66 (1.45 to 1.90)                                        | 0.51 (0.40 to 0.65)                                     | 5.75 (5.34 to 6.17)                                        | 0.69 (0.55 to 0.85)                                      |
|                               | AR with aspirin (%)                  | 1.70 (1.49 to 1.95)                                        | 0.47 (0.36 to 0.60)                                     | 6.23 (5.82 to 6.67)                                        | 1.11 (0.94 to 1.31)                                      |
|                               | ARR (%)                              | -0.04 (-0.37 to 0.28)                                      | 0.05 (0.00 to 0.96)                                     | -0.49 (-1.08 to 0.11)                                      | -0.43 (-0.19 to -0.66)                                   |
|                               | <sup>a</sup> NNT or <sup>b</sup> NNH | >1000 <sup>b</sup> (273 <sup>b</sup> to 354 <sup>a</sup> ) | >1000 (105 to >1000) <sup>a</sup>                       | 205 <sup>b</sup> (92 <sup>b</sup> to 937 <sup>a</sup> )    | 235 (151 to 531) <sup>b</sup>                            |
| 15-year                       | AR without aspirin (%)               | 2.48 (2.26 to 2.72)                                        | 0.88 (0.73 to 1.06)                                     | 9.62 (9.11 to 10.15)                                       | 1.03 (0.89 to 1.18)                                      |
|                               | AR with aspirin (%)                  | 2.55 (2.32 to 2.78)                                        | 0.71 (0.57 to 0.87)                                     | 9.94 (9.42 to 10.48)                                       | 1.66 (1.48 to 1.86)                                      |
|                               | ARR (%)                              | -0.06 (-0.39 to 0.26)                                      | 0.17 (0.04 to 0.55)                                     | -0.32 (-1.06 to 0.42)                                      | -0.64 (-0.40 to -0.87)                                   |
|                               | <sup>a</sup> NNT or <sup>b</sup> NNH | >1000 <sup>b</sup> (259 <sup>b</sup> to 382 <sup>a</sup> ) | 581 (181 to >1000) <sup>a</sup>                         | 312 <sup>b</sup> (94 <sup>b</sup> to 237 <sup>a</sup> )    | 157 (114 to 251) <sup>b</sup>                            |
| <b>Women ≥65 years</b>        |                                      |                                                            |                                                         |                                                            |                                                          |
| 10-year                       | AR without aspirin (%)               | 7.39 (6.12 to 8.82)                                        | 1.43 (0.92 to 2.15)                                     | 11.93 (10.32 to 13.66)                                     | 2.02 (1.39 to 2.86)                                      |
|                               | AR with aspirin (%)                  | 5.25 (4.18 to 6.49)                                        | 1.71 (1.13 to 2.47)                                     | 10.29 (8.81 to 11.91)                                      | 3.15 (2.34 to 4.14)                                      |
|                               | ARR (%)                              | 2.14 (0.85 to 4.52)                                        | -0.27 (-1.17 to 0.63)                                   | 1.64 (0.31 to 5.34)                                        | -1.12 (-2.28 to 0.04)                                    |
|                               | <sup>a</sup> NNT or <sup>b</sup> NNH | 47 (22 to 118) <sup>a</sup>                                | 369 <sup>b</sup> (85 <sup>b</sup> to 158 <sup>a</sup> ) | 61 (19 to 321) <sup>a</sup>                                | 89 <sup>b</sup> (44 <sup>b</sup> to >1000 <sup>a</sup> ) |
| 15-year                       | AR without aspirin (%)               | 10.88 (9.58 to 12.28)                                      | 2.06 (1.42 to 2.89)                                     | 17.44 (15.52 to 19.45)                                     | 3.02 (2.35 to 3.82)                                      |
|                               | AR with aspirin (%)                  | 7.77 (6.67 to 8.97)                                        | 2.17 (1.51 to 3.01)                                     | 15.39 (13.59 to 17.30)                                     | 4.68 (3.84 to 5.64)                                      |
|                               | ARR (%)                              | 3.11 (1.67 to 5.27)                                        | -0.11 (-1.15 to 0.93)                                   | 2.05 (0.43 to 6.28)                                        | -1.66 (-0.50 to -2.82)                                   |
|                               | <sup>a</sup> NNT or <sup>b</sup> NNH | 32 (19 to 60) <sup>a</sup>                                 | 924 <sup>b</sup> (87 <sup>b</sup> to 107 <sup>a</sup> ) | 49 (16 to 235) <sup>a</sup>                                | 60 (35 to 199) <sup>b</sup>                              |
| <b>Never smokers</b>          |                                      |                                                            |                                                         |                                                            |                                                          |
| 10-year                       | AR without aspirin (%)               | 1.85 (1.55 to 2.18)                                        | 0.57 (0.42 to 0.77)                                     | 5.43 (4.92 to 5.97)                                        | 0.69 (0.52 to 0.91)                                      |
|                               | AR with aspirin (%)                  | 1.53 (1.26 to 1.84)                                        | 0.54 (0.39 to 0.73)                                     | 6.63 (6.06 to 7.22)                                        | 1.16 (0.93 to 1.43)                                      |
|                               | ARR (%)                              | 0.32 (0.07 to 1.05)                                        | 0.03 (0.00 to 3.86)                                     | -1.20 (-0.41 to -1.98)                                     | -0.46 (-0.15 to -0.78)                                   |
|                               | <sup>a</sup> NNT or <sup>b</sup> NNH | 314 (95 to >1000) <sup>a</sup>                             | >1000 (26 to >1000) <sup>a</sup>                        | 83 (50 to 242) <sup>b</sup>                                | 215 (128 to 685) <sup>b</sup>                            |
| 15-year                       | AR without aspirin (%)               | 2.76 (2.46 to 3.09)                                        | 0.92 (0.72 to 1.16)                                     | 9.05 (8.40 to 9.73)                                        | 1.04 (0.86 to 1.25)                                      |
|                               | AR with aspirin (%)                  | 2.29 (2.01 to 2.59)                                        | 0.72 (0.55 to 0.94)                                     | 9.90 (9.22 to 10.61)                                       | 1.73 (1.49 to 2.00)                                      |
|                               | ARR (%)                              | 0.47 (0.18 to 1.09)                                        | 0.20 (0.04 to 0.75)                                     | -0.85 (-1.81 to 0.11)                                      | -0.69 (-0.37 to -1.01)                                   |
|                               | <sup>a</sup> NNT or <sup>b</sup> NNH | 211 (92 to 565) <sup>a</sup>                               | 509 (134 to >1000) <sup>a</sup>                         | 117 <sup>b</sup> (55 <sup>b</sup> to 911 <sup>a</sup> )    | 144 (99 to 267) <sup>b</sup>                             |
| <b>Past smokers</b>           |                                      |                                                            |                                                         |                                                            |                                                          |
| 10-year                       | AR without aspirin (%)               | 2.27 (1.88 to 2.71)                                        | 0.76 (0.55 to 1.03)                                     | 7.01 (6.33 to 7.75)                                        | 1.00 (0.75 to 1.30)                                      |
|                               | AR with aspirin (%)                  | 1.96 (1.60 to 2.37)                                        | 0.74 (0.53 to 1.01)                                     | 6.08 (5.44 to 6.76)                                        | 1.50 (1.19 to 1.86)                                      |
|                               | ARR (%)                              | 0.31 (0.04 to 1.48)                                        | 0.02 (0.00 to 24.90)                                    | 0.94 (0.30 to 2.37)                                        | -0.50 (-0.07 to -0.93)                                   |
|                               | <sup>a</sup> NNT or <sup>b</sup> NNH | 321 (68 to >1000) <sup>a</sup>                             | >1000 (4 to >1000) <sup>a</sup>                         | 107 (42 to 339) <sup>a</sup>                               | 200 (107 to >1000) <sup>b</sup>                          |
| 15-year                       | AR without aspirin (%)               | 3.38 (2.99 to 3.81)                                        | 1.21 (0.94 to 1.54)                                     | 11.50 (10.64 to 12.40)                                     | 1.49 (1.23 to 1.78)                                      |
|                               | AR with aspirin (%)                  | 2.92 (2.55 to 3.32)                                        | 1.06 (0.81 to 1.37)                                     | 10.28 (9.46 to 11.13)                                      | 2.24 (1.92 to 2.59)                                      |
|                               | ARR (%)                              | 0.46 (0.12 to 1.38)                                        | 0.15 (0.01 to 1.40)                                     | 1.22 (0.40 to 2.98)                                        | -0.75 (-0.31 to -1.18)                                   |
|                               | <sup>a</sup> NNT or <sup>b</sup> NNH | 216 (72 to 853) <sup>a</sup>                               | 662 (71 to >1000) <sup>a</sup>                          | 82 (34 to 250) <sup>a</sup>                                | 134 (85 to 322) <sup>b</sup>                             |
| <b>Current smokers</b>        |                                      |                                                            |                                                         |                                                            |                                                          |
| 10-year                       | AR without aspirin (%)               | 4.12 (3.22 to 5.18)                                        | 0.31 (0.12 to 0.69)                                     | 8.72 (7.41 to 10.16)                                       | 0.89 (0.51 to 1.47)                                      |
|                               | AR with aspirin (%)                  | 4.98 (3.99 to 6.14)                                        | 0.44 (0.20 to 0.87)                                     | 8.75 (7.43 to 10.20)                                       | 1.57 (1.04 to 2.27)                                      |
|                               | ARR (%)                              | -0.86 (-2.31 to 0.59)                                      | -0.13 (-0.55 to 0.29)                                   | -0.03 (-1.99 to 1.92)                                      | -0.68 (-1.44 to 0.09)                                    |
|                               | <sup>a</sup> NNT or <sup>b</sup> NNH | -116 (-43 to 169) <sup>a</sup>                             | -758 (-181 to 348) <sup>a</sup>                         | <1000 (50 to 52) <sup>b</sup>                              | 148 (-69 to >1000) <sup>b</sup>                          |
| 15-year                       | AR without aspirin (%)               | 6.12 (5.19 to 7.15)                                        | 0.75 (0.41 to 1.28)                                     | 13.28 (11.66 to 14.99)                                     | 1.33 (0.93 to 1.87)                                      |
|                               | AR with aspirin (%)                  | 7.38 (6.36 to 8.50)                                        | 0.88 (0.51 to 1.44)                                     | 14.06 (12.40 to 15.83)                                     | 2.34 (1.79 to 3.01)                                      |
|                               | ARR (%)                              | -1.26 (-2.71 to 0.19)                                      | -0.13 (-0.75 to 0.50)                                   | -0.79 (-3.18 to 1.60)                                      | -1.01 (-0.24 to -1.78)                                   |
|                               | <sup>a</sup> NNT or <sup>b</sup> NNH | -79 (-37 to 524) <sup>a</sup>                              | -783 (-133 to 201) <sup>a</sup>                         | 127 (31 to 62) <sup>b</sup>                                | 99 (56 to 420) <sup>b</sup>                              |

CI: Confidence interval ; AR: Absolute risk ; ARR: Absolute risk reduction ; <sup>a</sup>NNT: Number needed to treat ; <sup>b</sup>NNH: Number needed to harm. Risks were estimated based on the cumulative incidence function, accounting for competing risks.

|                               | <b>Total</b>                           | <b>Total<br/>adjusted weight of<br/>0.5 for gastro-<br/>intestinal bleeding</b> | <b>Total<br/>adjusted weight of<br/>0.25 for gastro-<br/>intestinal bleeding</b> | <b>Total<br/>adjusted weight of 0.1<br/>for gastro-intestinal<br/>bleeding</b> |                                                           |
|-------------------------------|----------------------------------------|---------------------------------------------------------------------------------|----------------------------------------------------------------------------------|--------------------------------------------------------------------------------|-----------------------------------------------------------|
|                               | Estimate (95% CI)                      | Estimate (95% CI)                                                               | Estimate (95% CI)                                                                | Estimate (95% CI)                                                              |                                                           |
| <b>Total study population</b> |                                        |                                                                                 |                                                                                  |                                                                                |                                                           |
| 10-year                       | AR without aspirin (%)                 | 10.11 (9.59 to 10.64)                                                           | 9.69 (9.18 to 10.22)                                                             | 9.49 (8.97 to 10.01)                                                           | 9.36 (8.85 to 9.89)                                       |
|                               | AR with aspirin (%)                    | 10.69 (10.16 to 11.23)                                                          | 10.02 (9.50 to 10.57)                                                            | 9.69 (9.16 to 10.23)                                                           | 9.49 (8.96 to 10.03)                                      |
|                               | ARR (%)                                | -0.58 (-1.33 to 0.17)                                                           | -0.33 (-1.08 to 0.42)                                                            | -0.20 (-0.95 to 0.54)                                                          | -0.13 (-0.88 to 0.62)                                     |
|                               | <sup>a</sup> iNNT or <sup>b</sup> iNNH | 172 <sup>b</sup> (605 <sup>b</sup> to 75 <sup>a</sup> )                         | 302 <sup>b</sup> (93 <sup>b</sup> to 240 <sup>a</sup> )                          | 488 <sup>b</sup> (105 <sup>b</sup> to 184 <sup>a</sup> )                       | 772 <sup>b</sup> (114 <sup>b</sup> to 162 <sup>a</sup> )  |
| 15-year                       | AR without aspirin (%)                 | 16.07 (15.46 to 16.68)                                                          | 15.45 (14.84 to 16.07)                                                           | 15.14 (14.53 to 15.76)                                                         | 14.95 (14.35 to 15.57)                                    |
|                               | AR with aspirin (%)                    | 16.49 (15.87 to 17.11)                                                          | 15.49 (14.88 to 16.12)                                                           | 15.00 (14.38 to 15.62)                                                         | 14.70 (14.09 to 15.32)                                    |
|                               | ARR (%)                                | -0.42 (-1.29 to 0.45)                                                           | -0.05 (-0.92 to 0.82)                                                            | 0.14 (0.00 to 0.79)                                                            | 0.25 (0.00 to 0.34)                                       |
|                               | <sup>a</sup> iNNT or <sup>b</sup> iNNH | 238 <sup>b</sup> (223 <sup>b</sup> to 78 <sup>a</sup> )                         | >1000 <sup>b</sup> (109 <sup>b</sup> to 121 <sup>a</sup> )                       | 703 (13 to >1000) <sup>a</sup>                                                 | 393 (29 to >1000) <sup>a</sup>                            |
| <b>Women &lt;65 years</b>     |                                        |                                                                                 |                                                                                  |                                                                                |                                                           |
| 10-year                       | AR without aspirin (%)                 | 8.61 (8.11 to 9.13)                                                             | 8.26 (7.76 to 8.78)                                                              | 8.09 (7.59 to 8.61)                                                            | 7.99 (7.49 to 8.51)                                       |
|                               | AR with aspirin (%)                    | 9.52 (8.99 to 10.06)                                                            | 8.96 (8.44 to 9.51)                                                              | 8.68 (8.16 to 9.23)                                                            | 8.52 (7.99 to 9.06)                                       |
|                               | ARR (%)                                | -0.91 (-0.17 to -1.65)                                                          | -0.70 (-1.44 to 0.04)                                                            | -0.59 (-1.33 to 0.15)                                                          | -0.53 (-1.27 to 0.21)                                     |
|                               | <sup>a</sup> iNNT or <sup>b</sup> iNNH | 110 (61 to 583) <sup>b</sup>                                                    | 143 <sup>b</sup> (70 <sup>b</sup> to >1000 <sup>a</sup> )                        | 169 <sup>b</sup> (75 <sup>b</sup> to 676 <sup>a</sup> )                        | 190 <sup>b</sup> (79 <sup>b</sup> to 472 <sup>a</sup> )   |
| 15-year                       | AR without aspirin (%)                 | 14.02 (13.41 to 14.63)                                                          | 13.50 (12.90 to 14.12)                                                           | 13.25 (12.64 to 13.86)                                                         | 13.09 (12.49 to 13.71)                                    |
|                               | AR with aspirin (%)                    | 14.86 (14.25 to 15.49)                                                          | 14.03 (13.41 to 14.66)                                                           | 13.62 (13.00 to 14.25)                                                         | 13.37 (12.75 to 14.00)                                    |
|                               | ARR (%)                                | -0.85 (-1.72 to 0.03)                                                           | -0.53 (-1.40 to 0.34)                                                            | -0.37 (-1.24 to 0.50)                                                          | -0.27 (-1.15 to 0.60)                                     |
|                               | <sup>a</sup> iNNT or <sup>b</sup> iNNH | 118 <sup>b</sup> (58 <sup>b</sup> to >1000 <sup>a</sup> )                       | 189 <sup>b</sup> (71 <sup>b</sup> to 291 <sup>a</sup> )                          | 271 <sup>b</sup> (81 <sup>b</sup> to 199 <sup>a</sup> )                        | 365 <sup>b</sup> (87 <sup>b</sup> to 167 <sup>a</sup> )   |
| <b>Women ≥65 years</b>        |                                        |                                                                                 |                                                                                  |                                                                                |                                                           |
| 10-year                       | AR without aspirin (%)                 | 22.78 (20.47 to 25.17)                                                          | 21.77 (19.46 to 24.16)                                                           | 21.26 (18.96 to 23.66)                                                         | 20.96 (18.66 to 23.36)                                    |
|                               | AR with aspirin (%)                    | 20.39 (18.21 to 22.67)                                                          | 18.82 (16.64 to 21.10)                                                           | 18.03 (15.86 to 20.32)                                                         | 17.56 (15.39 to 19.85)                                    |
|                               | ARR (%)                                | 2.39 (0.46 to 7.46)                                                             | 2.95 (0.81 to 7.58)                                                              | 3.23 (1.01 to 7.71)                                                            | 3.40 (1.13 to 7.81)                                       |
|                               | <sup>a</sup> iNNT or <sup>b</sup> iNNH | 42 (13 to 215) <sup>a</sup>                                                     | 34 (13 to 123) <sup>a</sup>                                                      | 31 (13 to 99) <sup>a</sup>                                                     | 29 (13 to 89) <sup>a</sup>                                |
| 15-year                       | AR without aspirin (%)                 | 33.40 (30.81 to 36.01)                                                          | 31.89 (29.30 to 34.50)                                                           | 31.13 (28.55 to 33.75)                                                         | 30.68 (28.10 to 33.30)                                    |
|                               | AR with aspirin (%)                    | 30.01 (27.55 to 32.50)                                                          | 27.67 (25.22 to 30.16)                                                           | 26.50 (24.05 to 29.00)                                                         | 25.79 (23.35 to 28.30)                                    |
|                               | ARR (%)                                | 3.39 (0.98 to 8.42)                                                             | 4.22 (1.59 to 8.90)                                                              | 4.64 (1.92 to 9.19)                                                            | 4.89 (2.13 to 9.38)                                       |
|                               | <sup>a</sup> iNNT or <sup>b</sup> iNNH | 29 (12 to 102) <sup>a</sup>                                                     | 24 (11 to 63) <sup>a</sup>                                                       | 22 (11 to 52) <sup>a</sup>                                                     | 20 (11 to 47) <sup>a</sup>                                |
| <b>Never smokers</b>          |                                        |                                                                                 |                                                                                  |                                                                                |                                                           |
| 10-year                       | AR without aspirin (%)                 | 8.54 (7.89 to 9.23)                                                             | 8.20 (7.54 to 8.88)                                                              | 8.02 (7.37 to 8.71)                                                            | 7.92 (7.27 to 8.61)                                       |
|                               | AR with aspirin (%)                    | 9.85 (9.15 to 10.59)                                                            | 9.27 (8.57 to 10.01)                                                             | 8.99 (8.29 to 9.72)                                                            | 8.81 (8.11 to 9.54)                                       |
|                               | ARR (%)                                | -1.31 (-0.33 to -2.29)                                                          | -1.08 (-0.10 to -2.06)                                                           | -0.96 (-1.94 to 0.02)                                                          | -0.89 (-1.87 to 0.09)                                     |
|                               | <sup>a</sup> iNNT or <sup>b</sup> iNNH | 76 (44 to 304) <sup>b</sup>                                                     | 93 (49 to >1000) <sup>b</sup>                                                    | 104 <sup>b</sup> (52 <sup>b</sup> to >1000 <sup>a</sup> )                      | 112 <sup>b</sup> (53 <sup>b</sup> to >1000 <sup>a</sup> ) |
| 15-year                       | AR without aspirin (%)                 | 13.77 (12.99 to 14.57)                                                          | 13.25 (12.47 to 14.05)                                                           | 12.99 (12.21 to 13.79)                                                         | 12.83 (12.05 to 13.64)                                    |
|                               | AR with aspirin (%)                    | 14.64 (13.84 to 15.47)                                                          | 13.78 (12.97 to 14.60)                                                           | 13.34 (12.54 to 14.17)                                                         | 13.08 (12.28 to 13.91)                                    |
|                               | ARR (%)                                | -0.87 (-2.01 to 0.26)                                                           | -0.53 (-1.67 to 0.61)                                                            | -0.36 (-1.49 to 0.78)                                                          | -0.25 (-1.39 to 0.89)                                     |
|                               | <sup>a</sup> iNNT or <sup>b</sup> iNNH | 114 <sup>b</sup> (50 <sup>b</sup> to 380 <sup>a</sup> )                         | 189 <sup>b</sup> (60 <sup>b</sup> to 164 <sup>a</sup> )                          | 282 <sup>b</sup> (67 <sup>b</sup> to 128 <sup>a</sup> )                        | 398 <sup>b</sup> (72 <sup>b</sup> to 113 <sup>a</sup> )   |
| <b>Past smokers</b>           |                                        |                                                                                 |                                                                                  |                                                                                |                                                           |
| 10-year                       | AR without aspirin (%)                 | 11.04 (10.16 to 11.96)                                                          | 10.54 (9.66 to 11.46)                                                            | 10.29 (9.41 to 11.21)                                                          | 10.14 (9.26 to 11.06)                                     |
|                               | AR with aspirin (%)                    | 10.26 (9.42 to 11.15)                                                           | 9.52 (8.67 to 10.41)                                                             | 9.14 (8.30 to 10.03)                                                           | 8.92 (8.08 to 9.81)                                       |
|                               | ARR (%)                                | 0.77 (0.11 to 3.06)                                                             | 1.02 (0.25 to 2.99)                                                              | 1.15 (0.33 to 3.02)                                                            | 1.22 (0.39 to 3.04)                                       |
|                               | <sup>a</sup> iNNT or <sup>b</sup> iNNH | 130 (33 to 885) <sup>a</sup>                                                    | 98 (33 to 398) <sup>a</sup>                                                      | 87 (33 to 300) <sup>a</sup>                                                    | 82 (33 to 259) <sup>a</sup>                               |
| 15-year                       | AR without aspirin (%)                 | 17.58 (16.54 to 18.65)                                                          | 16.84 (15.79 to 17.91)                                                           | 16.46 (15.42 to 17.54)                                                         | 16.24 (15.20 to 17.31)                                    |
|                               | AR with aspirin (%)                    | 16.49 (15.49 to 17.53)                                                          | 15.38 (14.37 to 16.41)                                                           | 14.82 (13.81 to 15.85)                                                         | 14.48 (13.48 to 15.52)                                    |
|                               | ARR (%)                                | 1.09 (0.23 to 3.49)                                                             | 1.46 (0.47 to 3.57)                                                              | 1.65 (0.61 to 3.67)                                                            | 1.76 (0.70 to 3.74)                                       |
|                               | <sup>a</sup> iNNT or <sup>b</sup> iNNH | 92 (29 to 442) <sup>a</sup>                                                     | 68 (28 to 213) <sup>a</sup>                                                      | 61 (27 to 164) <sup>a</sup>                                                    | 57 (27 to 144) <sup>a</sup>                               |
| <b>Current smokers</b>        |                                        |                                                                                 |                                                                                  |                                                                                |                                                           |
| 10-year                       | AR without aspirin (%)                 | 14.04 (12.32 to 15.87)                                                          | 13.60 (11.88 to 15.43)                                                           | 13.37 (11.66 to 15.20)                                                         | 13.24 (11.53 to 15.07)                                    |
|                               | AR with aspirin (%)                    | 15.74 (13.91 to 17.68)                                                          | 14.96 (13.13 to 16.90)                                                           | 14.57 (12.74 to 16.51)                                                         | 14.33 (12.51 to 16.27)                                    |
|                               | ARR (%)                                | -1.70 (-4.29 to 0.89)                                                           | -1.36 (-3.95 to 1.23)                                                            | -1.19 (-3.78 to 1.40)                                                          | -1.09 (-3.68 to 1.50)                                     |
|                               | <sup>a</sup> iNNT or <sup>b</sup> iNNH | 59 <sup>b</sup> (23 <sup>b</sup> to 112 <sup>a</sup> )                          | 73 <sup>b</sup> (25 <sup>b</sup> to 82 <sup>a</sup> )                            | 84 (26 to 72)                                                                  | 92 <sup>b</sup> (27 <sup>b</sup> to 67 <sup>a</sup> )     |
| 15-year                       | AR without aspirin (%)                 | 21.48 (19.49 to 23.55)                                                          | 20.82 (18.82 to 22.88)                                                           | 20.48 (18.49 to 22.55)                                                         | 20.28 (18.29 to 22.35)                                    |
|                               | AR with aspirin (%)                    | 24.67 (22.53 to 26.85)                                                          | 23.50 (21.37 to 25.69)                                                           | 22.91 (20.78 to 25.10)                                                         | 22.56 (20.43 to 24.75)                                    |
|                               | ARR (%)                                | -3.18 (-0.21 to -6.15)                                                          | -2.68 (-5.65 to 0.29)                                                            | -2.43 (-5.39 to 0.54)                                                          | -2.28 (-5.24 to 0.69)                                     |
|                               | <sup>a</sup> iNNT or <sup>b</sup> iNNH | 31 (16 to 466) <sup>b</sup>                                                     | 37 <sup>b</sup> (18 <sup>b</sup> to 346 <sup>a</sup> )                           | 41 (19 to 185) <sup>a</sup>                                                    | 44 <sup>b</sup> (19 <sup>b</sup> to 145 <sup>a</sup> )    |

CI: Confidence interval ; AR: Absolute risk ; ARR: Absolute risk reduction ; <sup>a</sup>iNNT: Number needed to treat ; <sup>b</sup>iNNH: Number needed to harm. Risks were estimated based on the cumulative incidence function, accounting for competing risks.

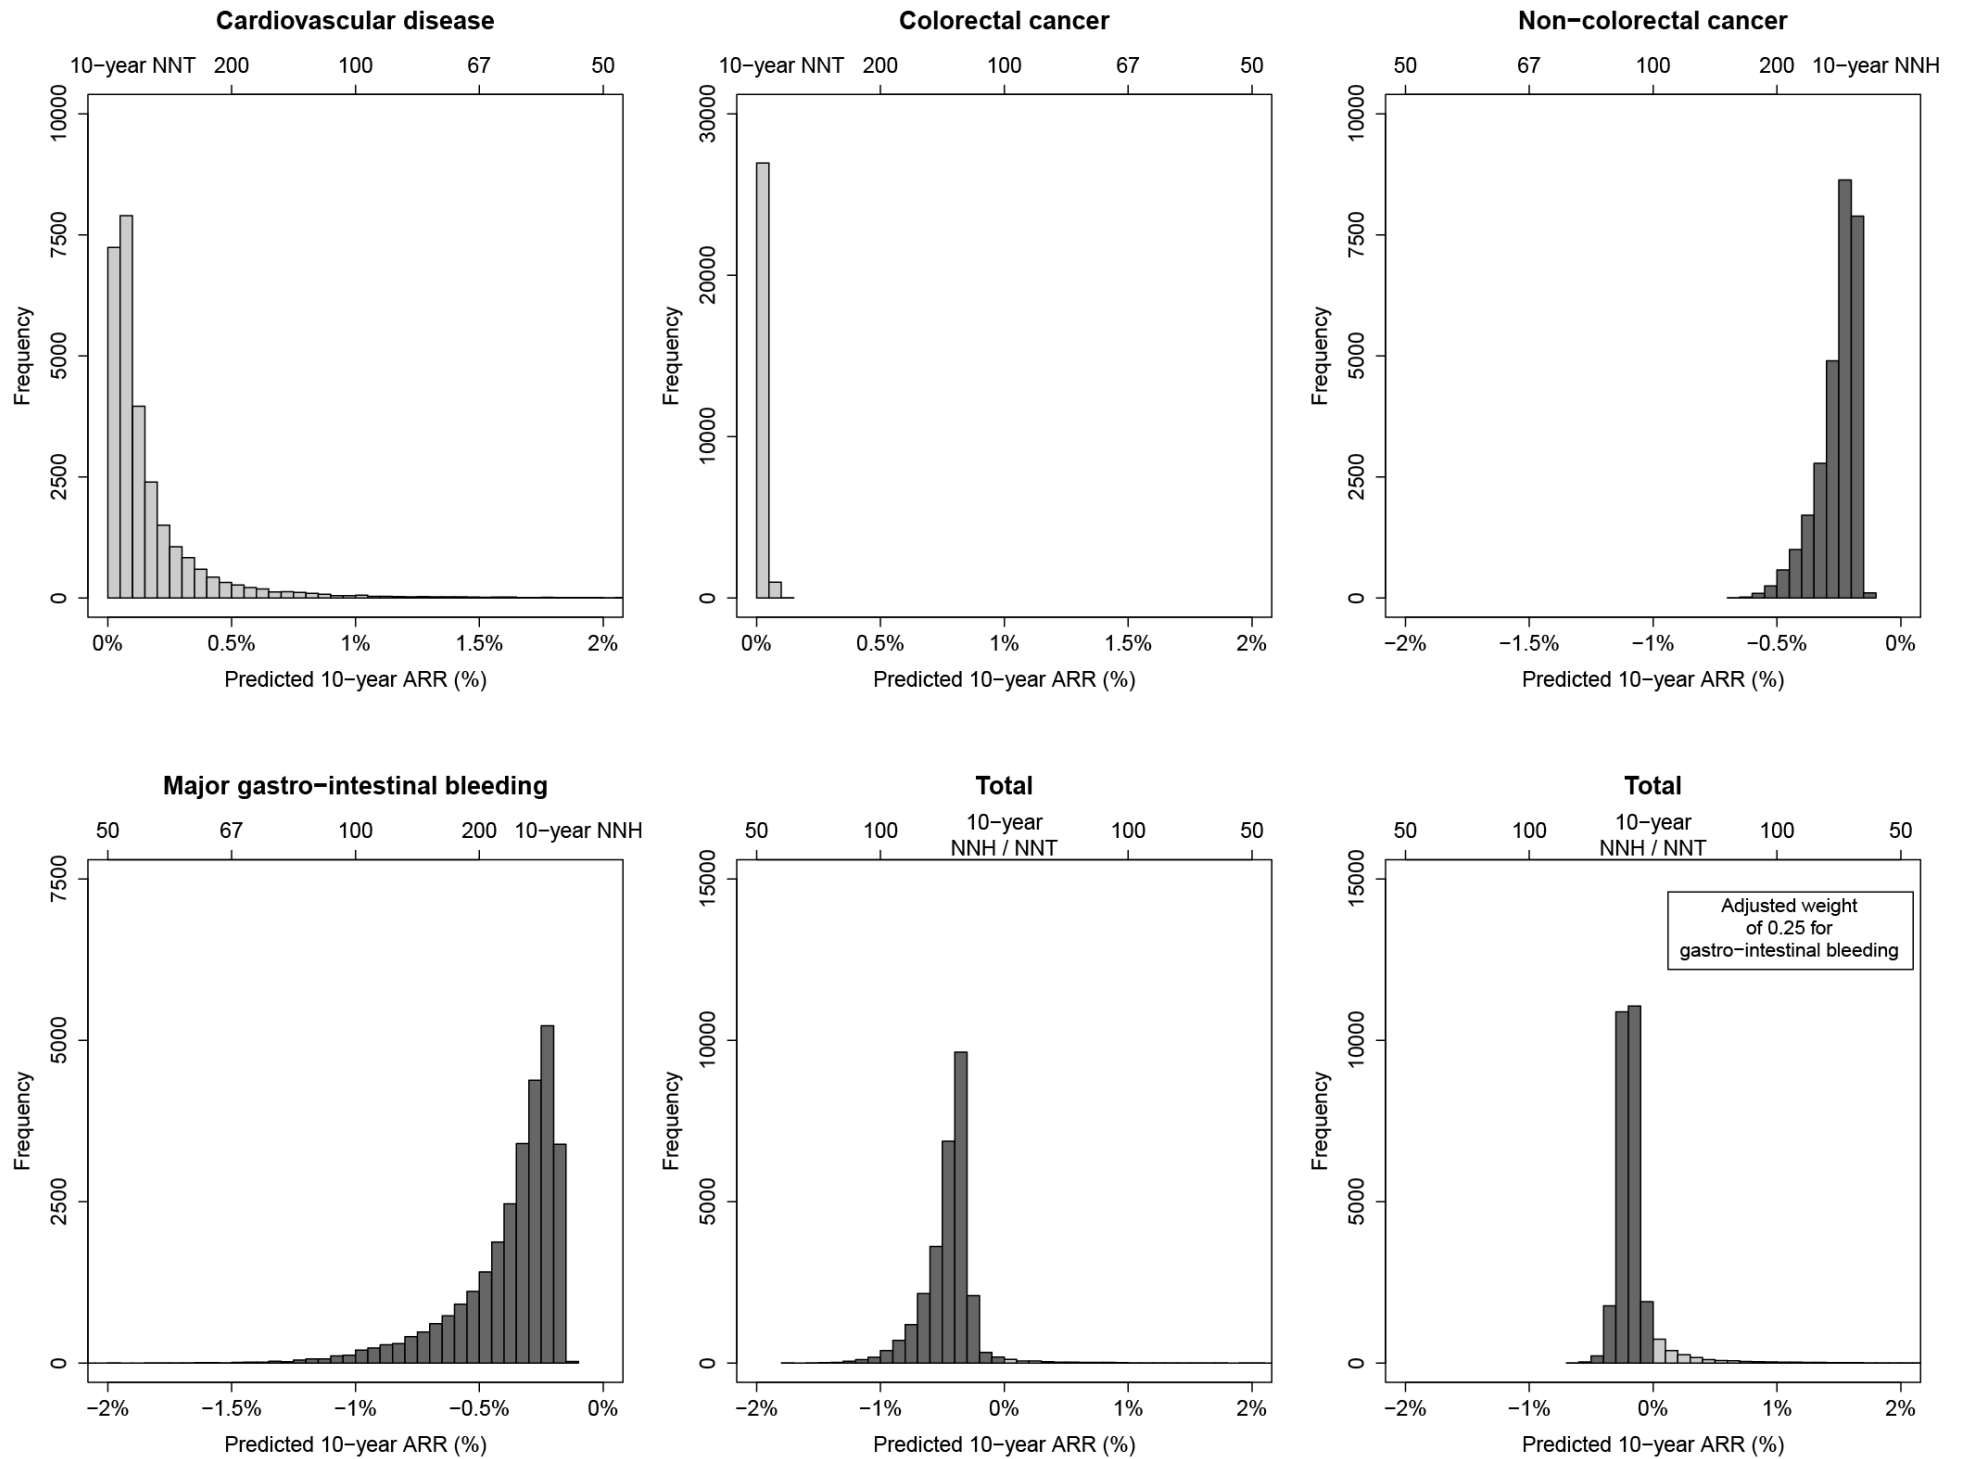

**Appendix 2.6** | Distribution of predicted 10-year absolute risk reduction for major cardiovascular events, colorectal cancer and major gastro-intestinal bleeding with aspirin



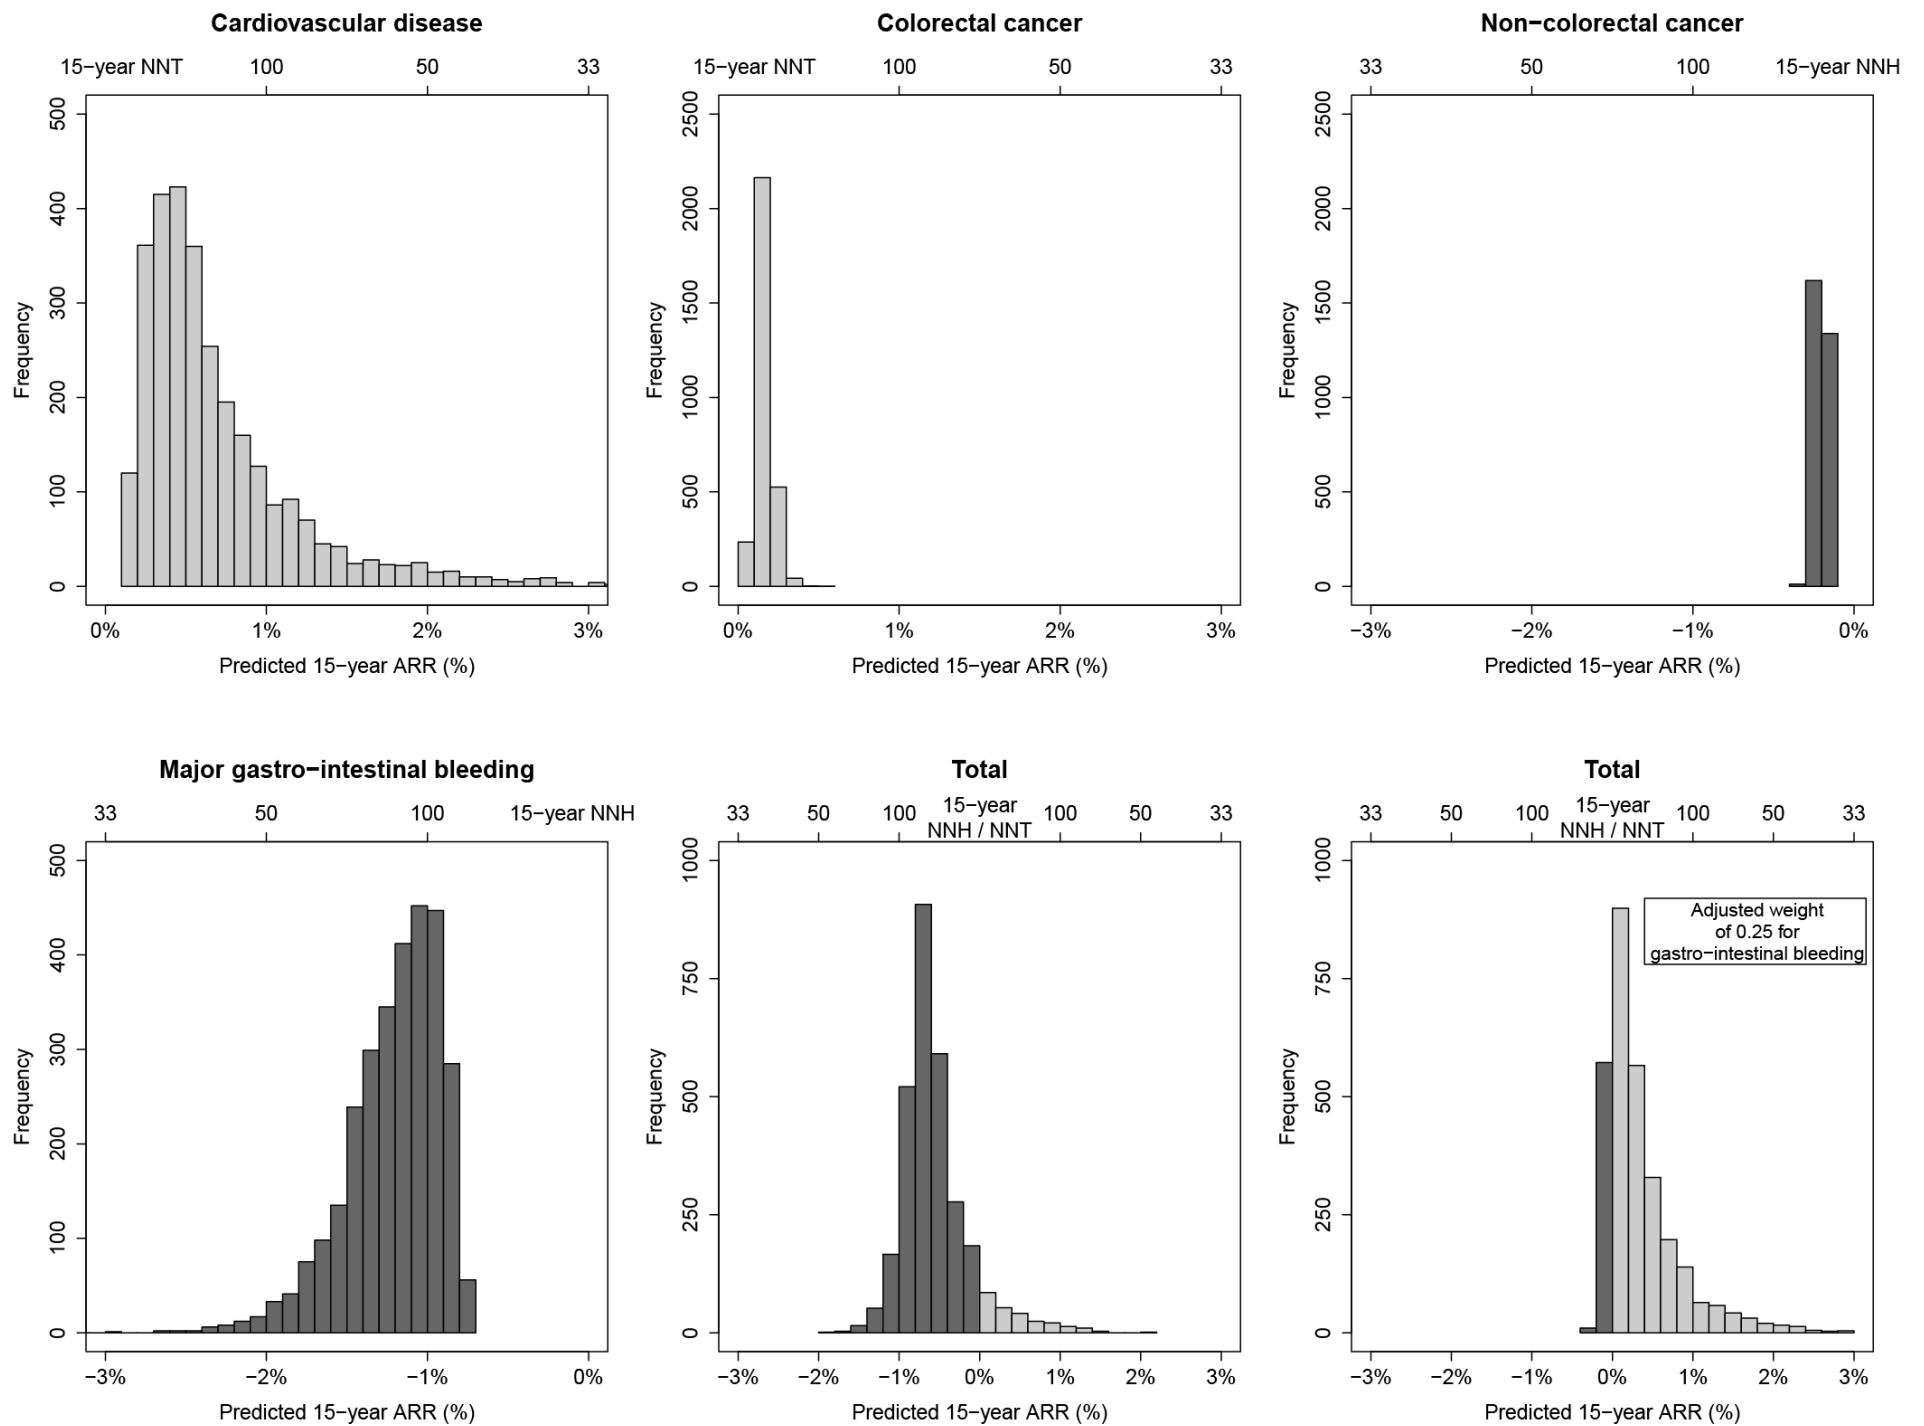

**Appendix 2.7** | Distribution of predicted 15-year absolute risk reduction for major cardiovascular events, colorectal cancer, non-colorectal cancer and major gastro-intestinal bleeding with aspirin treatment in participants of the Women’s Health Study of 65 years and older. ARR: absolute risk reduction ; NNT/NNH: Number needed to treat/harm.

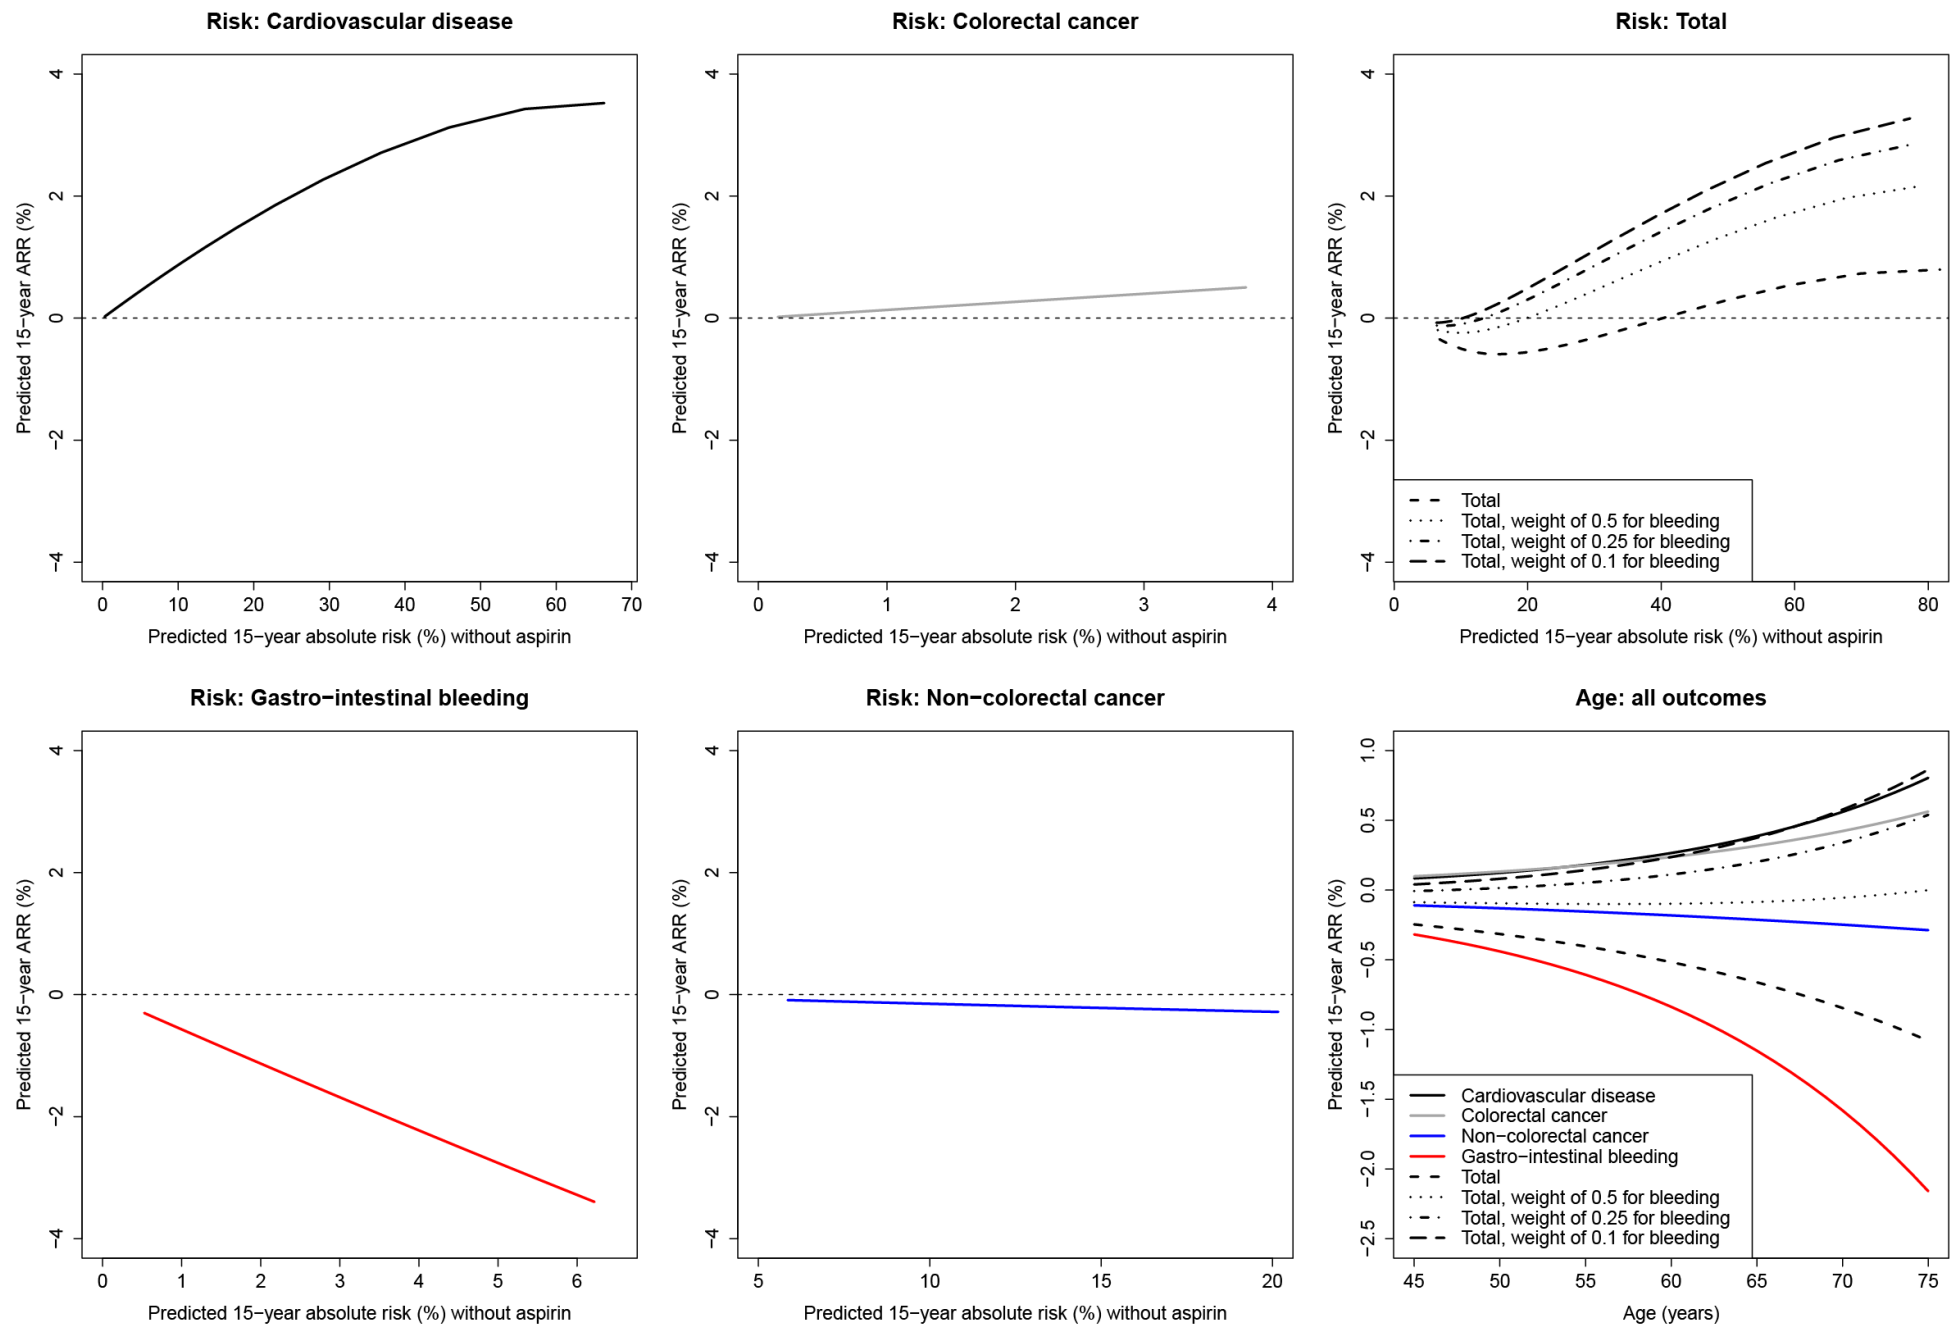

**Appendix 2.8** | Effect of baseline risk and age on predicted 15-year absolute risk reduction. ARR: absolute risk reduction. ARR in plot for age apply to an average participant of the Women's Health Study (i.e. a 55-year old postmenopausal woman who never smoked, does not have diabetes, history of dyspepsia or a family no family history of premature myocardial infarction or cancer, has a height of 65 inches, a BMI of 26 kg/m<sup>2</sup> and a systolic blood pressure of 124 mmHg and does not receive treatment for hypertension, with a serum level of high sensitivity C-reactive protein of 2.0 mg/L, total cholesterol of 212 mg/dL and a HDL-cholesterol of 54 mg/dL, drinks 2 alcoholic beverages per week and has never received hormone replacement therapy) with alternating age.

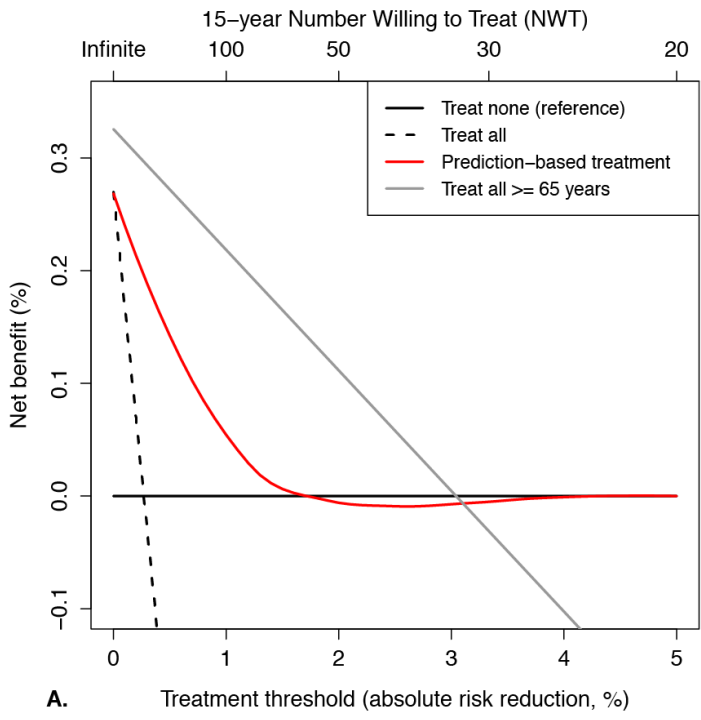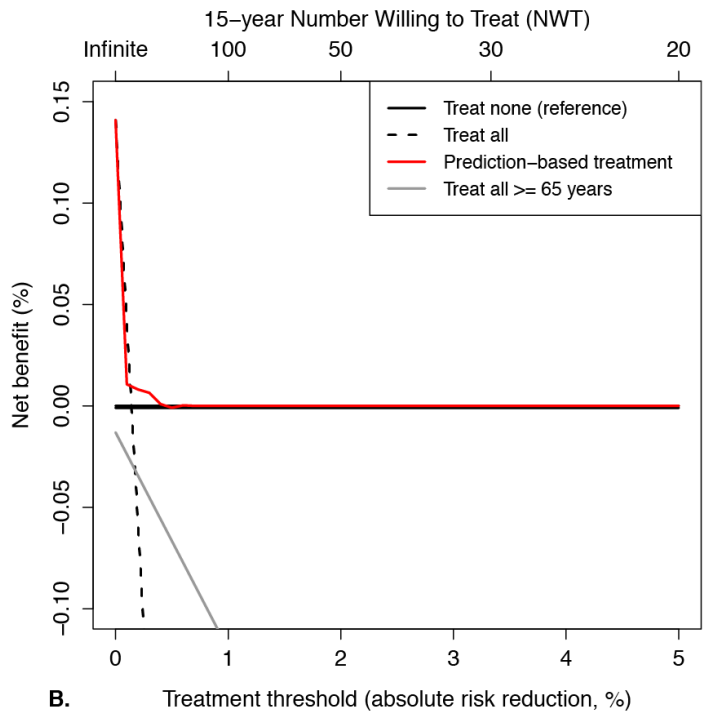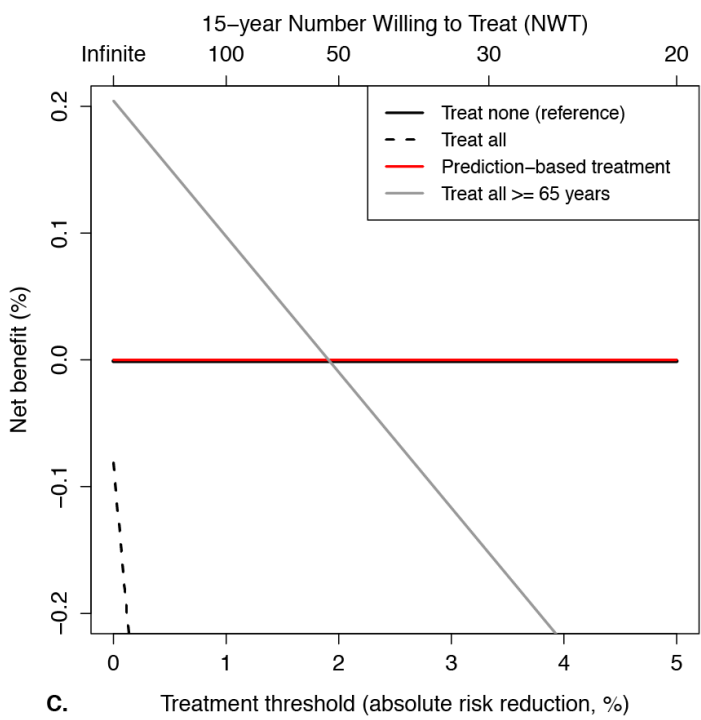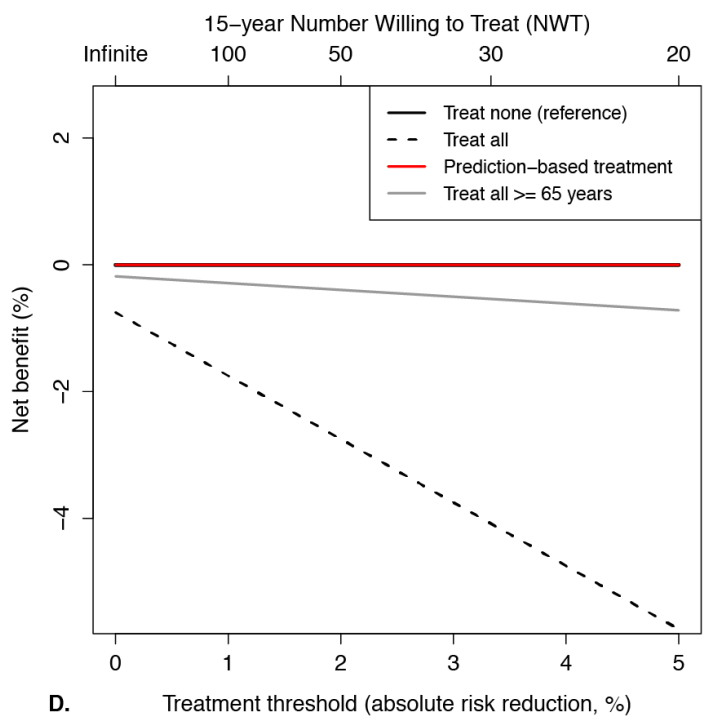

**Appendix 2.9** | Decision curves for different aspirin treatment strategies for the individual outcomes: **A.** Major cardiovascular events ; **B.** Colorectal cancer ; **C.** Non-colorectal cancer ; **D.** Major gastro-intestinal bleeding. Reading the net benefit plot starts with choosing a treatment threshold, that is the absolute risk reduction (ARR) at which one would opt for treatment, or number-willing-to-treat (NWT). A NWT of 30 implies that one is willing to treat 30 women to prevent at least 1 event. Positive net benefit means that the treatment strategy led to a more favourable trade-off between benefits (observed decrease in event rate) and harms (the proportion of patients receiving treatment weighted by the reciprocal of the treatment threshold). Since for non-colorectal cancer and major gastro-intestinal bleeding all patients had a negative predicted absolute risk prediction (meaning that their risk of those outcomes increases with aspirin), none will be selected for treatment over the full range of threshold values when applying prediction-based treatment and the net benefit for this treatment strategy is equal to zero.
